# Supplementary material for: Inside the Next Black Box: Examining Students’ Responses to Teacher Feedback in a Formative Assessment Context
Source: Frontiers journal article supplement (doi:10.3389/feduc.2022.751549), 2022-03-31
Supplement: Data_Sheet_1.pdf [file Data_Sheet_1.pdf]

## Appendix A

### Essay Assignment Writing Prompt and Checklist

#### *Life in a New Nation: Final Essay*

Essay Prompt: After the Revolutionary War, the United States began to govern itself, and many people and events started to help shape our new nation. Which **TWO** presidents listed below do you feel had the greatest impact on the United States? For each president, describe their time in office and include at least one major event that happened during their term(s) that you think helped to shape America. Lastly, which president do you feel had the least impact? Describe their presidency and why you feel this way. You may use *any* of your materials from this unit to help you in writing this essay.

#### First 7 American Presidents:

George Washington   John Adams   Thomas Jefferson   James Madison  
James Monroe   John Quincy Adams   Andrew Jackson

#### Make sure when writing your essay you:

- ☐ Include the necessary parts of an essay
- ☐ Include 2 presidents who you feel had the greatest impact
- ☐ Describe each president's time in office
- ☐ Explain a major event that shaped the nation during their term(s)
- ☐ Include 1 president who you feel had the least impact
- ☐ Describe this president's time in office
- ☐ Do NOT write in first person (NO I, me, my)
- ☐ Check your essay for capitalization
- ☐ Check your essay for spelling
- ☐ Check your essay for complete sentences
- ☐ Check your essay for punctuation
