# Supplementary material for: Inside the Next Black Box: Examining Students’ Responses to Teacher Feedback in a Formative Assessment Context
Source: Frontiers journal article supplement (doi:10.3389/feduc.2022.751549), 2022-03-31
Supplement: Table_1.pdf [file Table_1.pdf]

## Appendix B

### Survey of Motivational States

Project Student Code: \_\_\_\_\_

#### I. Implicit Theories of Intelligence Scale for Children

| <b>DIRECTIONS: Read each sentence below and then select the <i>one</i> number that shows how much you agree with it. There is no right or wrong answers.</b> | <i>Strongly disagree</i> | <i>Disagree</i> | <i>Mostly disagree</i> | <i>Mostly agree</i> | <i>Agree</i> | <i>Strongly agree</i> |
|--------------------------------------------------------------------------------------------------------------------------------------------------------------|--------------------------|-----------------|------------------------|---------------------|--------------|-----------------------|
| 1. You have a certain amount of intelligence, and you really can't do much to change it.                                                                     | 1                        | 2               | 3                      | 4                   | 5            | 6                     |
| 2. Your intelligence is something about you that you can't change very much.                                                                                 | 1                        | 2               | 3                      | 4                   | 5            | 6                     |
| 3. You can learn new things, but you can't really change your basic intelligence.                                                                            | 1                        | 2               | 3                      | 4                   | 5            | 6                     |
| 4. No matter who you are, you can change your intelligence a lot.                                                                                            | 1                        | 2               | 3                      | 4                   | 5            | 6                     |
| 5. You can always greatly change how intelligent you are.                                                                                                    | 1                        | 2               | 3                      | 4                   | 5            | 6                     |
| 6. No matter how much intelligence you have, you can always change it quite a bit.                                                                           | 1                        | 2               | 3                      | 4                   | 5            | 6                     |

#### II. Personal Achievement Goal Orientation (Midgley, et al., 2000)

| <b>DIRECTIONS: Read each sentence below and then select the <i>one</i> number that shows how much you agree with it. There are no right or wrong answers.</b> | <i>Strongly disagree</i> | <i>Disagree</i> | <i>Mostly disagree</i> | <i>Mostly agree</i> | <i>Agree</i> |
|---------------------------------------------------------------------------------------------------------------------------------------------------------------|--------------------------|-----------------|------------------------|---------------------|--------------|
| 1. It's important to me that I learn a lot of new concepts in writing this year.                                                                              | 1                        | 2               | 3                      | 4                   | 5            |
| 2. One of my goals in class is to learn as much as I can about writing.                                                                                       | 1                        | 2               | 3                      | 4                   | 5            |
| 3. One of my goals is to master a lot of new writing skills this year.                                                                                        | 1                        | 2               | 3                      | 4                   | 5            |
| 4. It is important to me that I thoroughly understand my writing classwork.                                                                                   | 1                        | 2               | 3                      | 4                   | 5            |
| 5. It's important to me that I improve my writing skills this year.                                                                                           | 1                        | 2               | 3                      | 4                   | 5            |
| 6. It is important to me that other students in my class think that I am good at writing.                                                                     | 1                        | 2               | 3                      | 4                   | 5            |
| 7. One of my goals is to show others that I am good at my writing class work.                                                                                 | 1                        | 2               | 3                      | 4                   | 5            |
| 8. One of my goals is to show others that writing is easy for me.                                                                                             | 1                        | 2               | 3                      | 4                   | 5            |

| <b>DIRECTIONS: Read each sentence below and then select the <i>one</i> number that shows how much you agree with it. There are no right or wrong answers.</b> |                                                                                                         | <i>Strongly disagree</i> | <i>Disagree</i> | <i>Mostly disagree</i> | <i>Mostly agree</i> | <i>Agree</i> |
|---------------------------------------------------------------------------------------------------------------------------------------------------------------|---------------------------------------------------------------------------------------------------------|--------------------------|-----------------|------------------------|---------------------|--------------|
| 9.                                                                                                                                                            | One of my goals is to look smart in comparison to the other students in my class.                       | 1                        | 2               | 3                      | 4                   | 5            |
| 10.                                                                                                                                                           | It is important to me that I look like I am a good writer compared to others in my class.               | 1                        | 2               | 3                      | 4                   | 5            |
| 11.                                                                                                                                                           | It is important to me that I don't look like I cannot write.                                            | 1                        | 2               | 3                      | 4                   | 5            |
| 12.                                                                                                                                                           | One of my goals is to keep others from thinking I'm not a good writer.                                  | 1                        | 2               | 3                      | 4                   | 5            |
| 13.                                                                                                                                                           | It's important to me that my teacher doesn't think that I know less about writing than others in class. | 1                        | 2               | 3                      | 4                   | 5            |
| 14.                                                                                                                                                           | One of my goals in class is to avoid looking like I have trouble with writing.                          | 1                        | 2               | 3                      | 4                   | 5            |

### III. Student Self-Efficacy for Writing (Andrade, 2009)

**DIRECTIONS:** On a scale from 0 (*cannot do it*) to 100 (*completely sure I can do it*), show how confident you are that you can perform each of the writing tasks below on this week's essay. You may use any number between 0 and 100. Write the number on the blank next to each statement.

|              |    |                             |    |                                |    |    |    |    |    |     |
|--------------|----|-----------------------------|----|--------------------------------|----|----|----|----|----|-----|
| Cannot do it |    | Medium/<br>Sure I can do it |    | Completely sure I can<br>do it |    |    |    |    |    |     |
| 0            | 10 | 20                          | 30 | 40                             | 50 | 60 | 70 | 80 | 90 | 100 |

  

|       |     |                                                                                                   |
|-------|-----|---------------------------------------------------------------------------------------------------|
| _____ | 1.  | Write a clear, focused essay that stays on topic.                                                 |
| _____ | 2.  | Use details to support my ideas.                                                                  |
| _____ | 3.  | Write a well-organized essay with an inviting beginning, developed middle, and meaningful ending. |
| _____ | 4.  | Correctly use paragraph format in the essay.                                                      |
| _____ | 5.  | Write with an engaging voice or tone.                                                             |
| _____ | 6.  | Use effective words in the essay.                                                                 |
| _____ | 7.  | Write well-constructed sentences in the essay.                                                    |
| _____ | 8.  | Use correct grammar in the essay.                                                                 |
| _____ | 9.  | Correctly spell all words in the essay.                                                           |
| _____ | 10. | Correctly use punctuation in the essay.                                                           |
| _____ | 11. | Write an essay good enough to earn a high grade.                                                  |

#### IV. **Task Motivation**

(This was administered with the Responses to Feedback Survey)

| On a scale from 1 ( <i>very low</i> ) to 5 ( <i>very high</i> )... | <i>Very Low</i> | <i>Low</i> | <i>Indifferent</i> | <i>High</i> | <i>Very High</i> |
|--------------------------------------------------------------------|-----------------|------------|--------------------|-------------|------------------|
| 1. how important is this essay to you or your future?              | 1               | 2          | 3                  | 4           | 5                |
| 2. how relevant is this essay to you or your future?               | 1               | 2          | 3                  | 4           | 5                |
| 3. how interested are you in working on this essay?                | 1               | 2          | 3                  | 4           | 5                |
