# Supplementary material for: Inside the Next Black Box: Examining Students’ Responses to Teacher Feedback in a Formative Assessment Context
Source: Frontiers journal article supplement (doi:10.3389/feduc.2022.751549), 2022-03-31
Supplement: Table_2.pdf [file Table_2.pdf]

## Appendix C

### Responses to Feedback (RtF) Survey

Please enter your 6-digit unique research code here. \_\_\_\_\_

**INSTRUCTION:** There are six parts to this survey. Please answer each question as you are thinking about the written feedback you just got back from your teacher on your Social Arts essay. Remember, there are no right or wrong answers. Just answer based on how you are thinking and feeling about your teacher's feedback.

*Part I: What does the feedback you received from your teacher look like? (Select all that apply.)*

There are...

- ☐ Symbols (e.g., ?, !, faces, checkmark, stars)
- ☐ Edits within my essay (e.g., cross-out or circled words, phrases or sentences, added words)
- ☐ Questions and comments in the margins of my essay
- ☐ Overall comments at the end of my essay
- ☐ A rubric or checklist that is marked up
- ☐ A number or letter grade
- ☐ Other, please specify: \_\_\_\_\_

*Part II: How much does each of these emotions reflect how you feel after reading your teacher's feedback? Select a choice from 1 (very untrue of me) to 6 (very true of me).*

| <i><b>My teacher's feedback makes me feel...</b></i> | <i><b>Very Untrue of me</b></i> | <i><b>Untrue of me</b></i> | <i><b>Somewhat untrue of me</b></i> | <i><b>Somewhat true of me</b></i> | <i><b>True of me</b></i> | <i><b>Very true of me</b></i> |
|------------------------------------------------------|---------------------------------|----------------------------|-------------------------------------|-----------------------------------|--------------------------|-------------------------------|
| 1. Interested                                        | 1                               | 2                          | 3                                   | 4                                 | 5                        | 6                             |
| 2. Ashamed                                           | 1                               | 2                          | 3                                   | 4                                 | 5                        | 6                             |
| 3. Proud                                             | 1                               | 2                          | 3                                   | 4                                 | 5                        | 6                             |
| 4. Concerned                                         | 1                               | 2                          | 3                                   | 4                                 | 5                        | 6                             |
| 5. Hopeful                                           | 1                               | 2                          | 3                                   | 4                                 | 5                        | 6                             |
| 6. Weak                                              | 1                               | 2                          | 3                                   | 4                                 | 5                        | 6                             |
| 7. Strong                                            | 1                               | 2                          | 3                                   | 4                                 | 5                        | 6                             |
| 8. Unsure                                            | 1                               | 2                          | 3                                   | 4                                 | 5                        | 6                             |
| 9. Confident                                         | 1                               | 2                          | 3                                   | 4                                 | 5                        | 6                             |
| 10. Hurt                                             | 1                               | 2                          | 3                                   | 4                                 | 5                        | 6                             |
| 11. Comforted                                        | 1                               | 2                          | 3                                   | 4                                 | 5                        | 6                             |
| 12. Deflated                                         | 1                               | 2                          | 3                                   | 4                                 | 5                        | 6                             |
| 13. Nervous                                          | 1                               | 2                          | 3                                   | 4                                 | 5                        | 6                             |
| 14. Enthusiastic                                     | 1                               | 2                          | 3                                   | 4                                 | 5                        | 6                             |

|                                               | <i>Very Untrue<br/>of me</i> | <i>Untrue of me</i> | <i>Somewhat<br/>untrue of me</i> | <i>Somewhat<br/>true of me</i> | <i>True of me</i> | <i>Very true of<br/>me</i> |
|-----------------------------------------------|------------------------------|---------------------|----------------------------------|--------------------------------|-------------------|----------------------------|
| <i>My teacher's feedback makes me feel...</i> |                              |                     |                                  |                                |                   |                            |
| 15. Calm                                      | 1                            | 2                   | 3                                | 4                              | 5                 | 6                          |
| 16. Irritated                                 | 1                            | 2                   | 3                                | 4                              | 5                 | 6                          |
| 17. Insulted                                  | 1                            | 2                   | 3                                | 4                              | 5                 | 6                          |
| 18. Inspired                                  | 1                            | 2                   | 3                                | 4                              | 5                 | 6                          |
| 19. Upset                                     | 1                            | 2                   | 3                                | 4                              | 5                 | 6                          |
| 20. Happy                                     | 1                            | 2                   | 3                                | 4                              | 5                 | 6                          |
| 21. Disappointed                              | 1                            | 2                   | 3                                | 4                              | 5                 | 6                          |

*Part III: How much do you agree or disagree that these words describe your teacher's feedback? Select a choice from 1 (strongly disagree) to 6 (strongly agree).*

|                                    | <i>Strongly<br/>disagree</i> | <i>Disagree</i> | <i>Slightly<br/>disagree</i> | <i>Slightly<br/>agree</i> | <i>Agree</i> | <i>Strongly<br/>agree</i> |
|------------------------------------|------------------------------|-----------------|------------------------------|---------------------------|--------------|---------------------------|
| <i>My teacher's feedback is...</i> |                              |                 |                              |                           |              |                           |
| 1. Right                           | 1                            | 2               | 3                            | 4                         | 5            | 6                         |
| 2. Wrong                           | 1                            | 2               | 3                            | 4                         | 5            | 6                         |
| 3. Clear                           | 1                            | 2               | 3                            | 4                         | 5            | 6                         |
| 4. Confusing                       | 1                            | 2               | 3                            | 4                         | 5            | 6                         |
| 5. Useless                         | 1                            | 2               | 3                            | 4                         | 5            | 6                         |
| 6. Informative                     | 1                            | 2               | 3                            | 4                         | 5            | 6                         |
| 7. Vague                           | 1                            | 2               | 3                            | 4                         | 5            | 6                         |
| 8. Specific                        | 1                            | 2               | 3                            | 4                         | 5            | 6                         |
| 9. Respectful                      | 1                            | 2               | 3                            | 4                         | 5            | 6                         |
| 10. Rude                           | 1                            | 2               | 3                            | 4                         | 5            | 6                         |
| 11. Comforting                     | 1                            | 2               | 3                            | 4                         | 5            | 6                         |
| 12. Hurtful                        | 1                            | 2               | 3                            | 4                         | 5            | 6                         |
| 13. Mean                           | 1                            | 2               | 3                            | 4                         | 5            | 6                         |
| 14. Friendly                       | 1                            | 2               | 3                            | 4                         | 5            | 6                         |
| 15. Unhelpful                      | 1                            | 2               | 3                            | 4                         | 5            | 6                         |
| 16. Helpful                        | 1                            | 2               | 3                            | 4                         | 5            | 6                         |
| 17. Surprising                     | 1                            | 2               | 3                            | 4                         | 5            | 6                         |
| 18. Expected                       | 1                            | 2               | 3                            | 4                         | 5            | 6                         |
| 19. Pleasant                       | 1                            | 2               | 3                            | 4                         | 5            | 6                         |
| 20. Unpleasant                     | 1                            | 2               | 3                            | 4                         | 5            | 6                         |

*Part IV: How much do you agree or disagree that your teacher's feedback does each of the following? Select a choice from 1 (strongly disagree) to 6 (strongly agree).*

|                                                            | <i>Strongly disagree</i> | <i>Disagree</i> | <i>Slightly disagree</i> | <i>Slightly agree</i> | <i>Agree</i> | <i>Strongly agree</i> |
|------------------------------------------------------------|--------------------------|-----------------|--------------------------|-----------------------|--------------|-----------------------|
| <b><i>My teacher's feedback...</i></b>                     |                          |                 |                          |                       |              |                       |
| 1. explains what I am expected to do for this assignment.  | 1                        | 2               | 3                        | 4                     | 5            | 6                     |
| 2. includes specific comments about what I did well.       | 1                        | 2               | 3                        | 4                     | 5            | 6                     |
| 3. includes specific comments about what I should improve. | 1                        | 2               | 3                        | 4                     | 5            | 6                     |
| 4. gives suggestions on what I can do next.                | 1                        | 2               | 3                        | 4                     | 5            | 6                     |
| 5. gives suggestions on writing strategies I can try.      | 1                        | 2               | 3                        | 4                     | 5            | 6                     |
| 6. includes questions about what I wrote.                  | 1                        | 2               | 3                        | 4                     | 5            | 6                     |
| 7. includes marks or comments that I do not understand.    | 1                        | 2               | 3                        | 4                     | 5            | 6                     |
| 8. tells me to do better, but does not say how.            | 1                        | 2               | 3                        | 4                     | 5            | 6                     |
| 9. tells me I did well, but does not say how.              | 1                        | 2               | 3                        | 4                     | 5            | 6                     |
| 10. tells me about my work, not me as a person.            | 1                        | 2               | 3                        | 4                     | 5            | 6                     |
| 11. lets me know I can ask her for help.                   | 1                        | 2               | 3                        | 4                     | 5            | 6                     |
| 12. gives suggestions on resources I could use.            | 1                        | 2               | 3                        | 4                     | 5            | 6                     |
| 13. focuses on what I thought is important.                | 1                        | 2               | 3                        | 4                     | 5            | 6                     |
| 14. tells me my essay is very good.                        | 1                        | 2               | 3                        | 4                     | 5            | 6                     |
| 15. tells me my essay needs a lot of work.                 | 1                        | 2               | 3                        | 4                     | 5            | 6                     |
| 16. tells me about me as a person, not my work.            | 1                        | 2               | 3                        | 4                     | 5            | 6                     |

*Part V: How much do you agree or disagree that the feedback does each of the following? Select a choice from 1 (definitely not) to 6 (most definitely).*

|                                                                       | <i>Definitely not</i> | <i>Very unlikely</i> | <i>Somewhat unlikely</i> | <i>Somewhat likely</i> | <i>Very likely</i> | <i>Most definitely</i> |
|-----------------------------------------------------------------------|-----------------------|----------------------|--------------------------|------------------------|--------------------|------------------------|
| <b><i>I got the feedback I did on my essay because of...</i></b>      |                       |                      |                          |                        |                    |                        |
| 1. the effort I put in to writing it.                                 | 1                     | 2                    | 3                        | 4                      | 5                  | 6                      |
| 2. the strategies I used to write it.                                 | 1                     | 2                    | 3                        | 4                      | 5                  | 6                      |
| 3. my understanding of what I have to do for the essay.               | 1                     | 2                    | 3                        | 4                      | 5                  | 6                      |
| 4. my understanding of the content.                                   | 1                     | 2                    | 3                        | 4                      | 5                  | 6                      |
| 5. what my teacher thinks of my writing abilities.                    | 1                     | 2                    | 3                        | 4                      | 5                  | 6                      |
| 6. what my teacher thinks of me in general.                           | 1                     | 2                    | 3                        | 4                      | 5                  | 6                      |
| 7. the luck I am having with this essay.                              | 1                     | 2                    | 3                        | 4                      | 5                  | 6                      |
| 8. the difficulty of this essay.                                      | 1                     | 2                    | 3                        | 4                      | 5                  | 6                      |
| 9. what my teacher thinks about my understanding of the content.      | 1                     | 2                    | 3                        | 4                      | 5                  | 6                      |
| 10. what my teachers thinks about my understanding of the assignment. | 1                     | 2                    | 3                        | 4                      | 5                  | 6                      |
| 11. my natural writing talents.                                       | 1                     | 2                    | 3                        | 4                      | 5                  | 6                      |
| 12. tells me about me as a person, not my work.                       | 1                     | 2                    | 3                        | 4                      | 5                  | 6                      |

You have reached the last part of this survey. Please continue to answer the questions based specifically on the feedback your teacher gave you on your Social Arts essay you just got back.

Review your essay and feedback again. Then proceed to the next page.

*Part VI: How much do you agree or disagree that you will now do the following? Select a choice from 1 (strongly disagree) to 6 (strongly agree).*

|                                                                        | <i>Strongly disagree</i> | <i>Disagree</i> | <i>Slightly disagree</i> | <i>Slightly agree</i> | <i>Agree</i> | <i>Strongly agree</i> |
|------------------------------------------------------------------------|--------------------------|-----------------|--------------------------|-----------------------|--------------|-----------------------|
| <b><i>Based on my teacher's feedback on my essay, I plan to...</i></b> |                          |                 |                          |                       |              |                       |
| 1. change the amount of effort I spend on the new draft.               | 1                        | 2               | 3                        | 4                     | 5            | 6                     |
| 2. ask for a second opinion about my essay.                            | 1                        | 2               | 3                        | 4                     | 5            | 6                     |
| 3. make the corrections my teacher noted on my draft.                  | 1                        | 2               | 3                        | 4                     | 5            | 6                     |
| 4. find more information or materials to include in my next draft.     | 1                        | 2               | 3                        | 4                     | 5            | 6                     |
| 5. try different writing strategies when I work on my next draft.      | 1                        | 2               | 3                        | 4                     | 5            | 6                     |
| 6. reread my teacher's feedback to understand it better.               | 1                        | 2               | 3                        | 4                     | 5            | 6                     |
| 7. review the requirements of the essay.                               | 1                        | 2               | 3                        | 4                     | 5            | 6                     |
| 8. leave my essay as it is; don't change it.                           | 1                        | 2               | 3                        | 4                     | 5            | 6                     |
| 9. ignore the feedback and keep working on my essay my way.            | 1                        | 2               | 3                        | 4                     | 5            | 6                     |
| 10. do some practice worksheets to improve my writing.                 | 1                        | 2               | 3                        | 4                     | 5            | 6                     |
| 11. start over and rewrite my essay.                                   | 1                        | 2               | 3                        | 4                     | 5            | 6                     |
| 12. figure out what to do with this essay, because I am not yet sure.  | 1                        | 2               | 3                        | 4                     | 5            | 6                     |
